# Supplementary material for: CRISPR-Knockout of CSE Gene Improves Saccharification Efficiency by Reducing Lignin Content in Hybrid Poplar
Source: MDPI journal article supplement (doi:10.3390/ijms22189750), 2021-09-09
Supplement: s1 [file s1]

## Supplementary materials

**Table S1. Primers used in this study.**

| Gene ID                                           | Gene Name                               | Primer direction                        | Sequence (5'-3')                                                 |                                                                |
|---------------------------------------------------|-----------------------------------------|-----------------------------------------|------------------------------------------------------------------|----------------------------------------------------------------|
| <i>Constructs for producing transgenic plants</i> |                                         |                                         |                                                                  |                                                                |
| Potri. 001G175000                                 | <i>PtrCSE1</i>                          | Forward                                 | ATGTCATCCGAAACGCAGCAACCC                                         |                                                                |
|                                                   |                                         | Reverse                                 | TCAGTCATCGCTTTTTTTGGACC                                          |                                                                |
| Potri. 003G059200                                 | <i>PtrCSE2</i>                          | Forward                                 | ATGCCATCCGAAGCGCAGCA                                             |                                                                |
|                                                   |                                         | Reverse                                 | TCAATCATCACTCTTTGTAGACC                                          |                                                                |
| <i>For Mi-seq analysis</i>                        |                                         |                                         |                                                                  |                                                                |
| Potri. 001G175000                                 | <i>CSE1</i> -sg1_Mi-seq_1 <sup>st</sup> | Forward                                 | GTCAACCAGCCAAGCCT                                                |                                                                |
|                                                   |                                         | Reverse                                 | GAGTTAATTACCCATGTAGCA                                            |                                                                |
|                                                   | <i>CSE1</i> -sg1_Mi-seq_2 <sup>nd</sup> | Forward                                 | <u>ACACTCTTTCCCTACACGACGCTCTTCCGATCT</u> ATGTCATCCGAAACGCAGC     |                                                                |
|                                                   |                                         | Reverse                                 | <u>GTGACTGGAGTTCAGACGTGTGCTCTTCCGATCT</u> GGTCATATATACCGTGGCTT   |                                                                |
|                                                   | <i>CSE1</i> -sg2_Mi-seq_1 <sup>st</sup> | Forward                                 | ATGGACAAGATTGCTGCCA                                              |                                                                |
|                                                   |                                         | Reverse                                 | TCATCGCTTCTGGTATGACAA                                            |                                                                |
|                                                   | <i>CSE1</i> -sg2_Mi-seq_2 <sup>nd</sup> | Forward                                 | <u>ACACTCTTTCCCTACACGACGCTCTTCCGATCT</u> ATGGACAAGATTGCTGCCA     |                                                                |
|                                                   |                                         | Reverse                                 | <u>GTGACTGGAGTTTCAGACGTGTGCTCTTCCGATCTT</u> CATCGCTTCTGGTATGACAA |                                                                |
|                                                   | Potri. 003G059200                       | <i>CSE2</i> -sg1_Mi-seq_1 <sup>st</sup> | Forward                                                          | CTCTGTTTAAAAGTCAA                                              |
|                                                   |                                         |                                         | Reverse                                                          | GTGCATTAATTACCCATGTAG                                          |
|                                                   |                                         | <i>CSE2</i> -sg1_Mi-seq_2 <sup>nd</sup> | Forward                                                          | <u>ACACTCTTTCCCTACACGACGCTCTTCCGATCT</u> ATGCCATCCGAAGCGCA     |
|                                                   |                                         |                                         | Reverse                                                          | <u>GTGACTGGAGTTCAGACGTGTGCTCTTCCGATCT</u> ATACACCGTGGCTTTGACCT |
| <i>CSE2</i> -sg3_Mi-seq_1 <sup>st</sup>           |                                         | Forward                                 | CGACATGGAGAAAATTGCTGC                                            |                                                                |
|                                                   |                                         | Reverse                                 | TCAATCATCACTCTTTGTAGACC                                          |                                                                |
| <i>CSE2</i> -sg3_Mi-seq_2 <sup>nd</sup>           |                                         | Forward                                 | <u>ACACTCTTTCCCTACACGACGCTCTTCCGATCT</u> CGACATGGAGAAAATTGCTGC   |                                                                |
|                                                   |                                         | Reverse                                 | <u>GTGACTGGAGTTCAGACGTGTGCTCTTCCGATCT</u> ATCACGCCGTCACGT        |                                                                |
| <i>For quantitative RT-PCR</i>                    |                                         |                                         |                                                                  |                                                                |
| Potri. 001G309500                                 |                                         | <i>Poplar ACTIN7</i>                    | Forward                                                          | GCATCCACGAGACTACATACAACCTCA                                    |
|                                                   | Reverse                                 |                                         | GTGATCTCCTTGCTCATTTCGGTCA                                        |                                                                |
| Potri. 001G175000                                 | <i>CSE1</i> -sg2                        | Forward                                 | GCGCTTCAGCGAACCATACA                                             |                                                                |
|                                                   |                                         | Reverse                                 | CATCGCTTCTGGTATGACAAAAAG                                         |                                                                |
| Potri. 003G059200                                 | <i>CSE2</i> -sg3                        | Forward                                 | GCCTTCTTATTGGCGAGTC                                              |                                                                |
|                                                   |                                         | Reverse                                 | TGCCTTACTAGGTTTCATTGGT                                           |                                                                |
| Potri. 010G224100.1                               | <i>PtrPAL4</i>                          | Forward                                 | CCTACATTGACGATCCTTGACG                                           |                                                                |
|                                                   |                                         | Reverse                                 | GACCTGCATTCCTTGATCCTG                                            |                                                                |
| Potri. 006G033300.1                               | <i>PtrC3H3</i>                          | Forward                                 | GAGGTTCTTGAGGAGGATG                                              |                                                                |
|                                                   |                                         | Reverse                                 | GGAGTCGTCATGTAAGTGAC                                             |                                                                |
| Potri. 013G157900.1                               | <i>PtrC4H1</i>                          | Forward                                 | ACTCTGGGACGTCTGGTACA                                             |                                                                |
|                                                   |                                         | Reverse                                 | GCTTCATAGATTTACAGTGACACCC                                        |                                                                |

|                     |                     |         |                           |
|---------------------|---------------------|---------|---------------------------|
| Potri. 019G130700.1 | <i>PtrC4H2</i>      | Forward | GAGCAAGATCCTGGTAAACGC     |
|                     |                     | Reverse | CTGAGGTGTCAATCTTGACTG     |
| Potri. 003G183900.1 | <i>PtrHCT1</i>      | Forward | ATCAGCATGTAAGGCACGCGG     |
|                     |                     | Reverse | TGCCAAAGTAACCAGGTGGAAGCGT |
| Potri. 003G188500.1 | <i>Ptr4CL5</i>      | Forward | CATCCGAGGTGATCAGATCATG    |
|                     |                     | Reverse | CACAGCAGCATCAGATATCC      |
| Potri. 012G006400.1 | <i>PtrCOMT2</i>     | Forward | CATGAAGTGGATATGCCATG      |
|                     |                     | Reverse | GTTGAATGCACAGCACATTAC     |
| Potri. 009G099800.1 | <i>PtrCCOAOsMT1</i> | Forward | CAAGAGGTTGATTGAGCTTG      |
|                     |                     | Reverse | GGTCAGCAGCAAGTGCCTTG      |
| Potri. 003G181400.1 | <i>PtrCCR2</i>      | Forward | CTGTTCAAGCTTATGTGCATG     |
|                     |                     | Reverse | GTGGAGAACGCTCTCAGAGC      |
| Potri. 009G095800.1 | <i>PtrCAD1</i>      | Forward | CAAGCTGATCTTGATGGGTG      |
|                     |                     | Reverse | CGAATCTATATCTCACATC       |
| Potri. 001G118800.1 | <i>PtrMYB2</i>      | Forward | CGAATACTAACGACGACACG      |
|                     |                     | Reverse | GTGTTCCATCTCTAATGTGC      |
| Potri. 017G130300.1 | <i>PtrMYB152</i>    | Forward | GAAGACTTGCTACTGCCAGAT     |
|                     |                     | Reverse | TCATTCTTGAGCACTGATTG      |

---

(a)

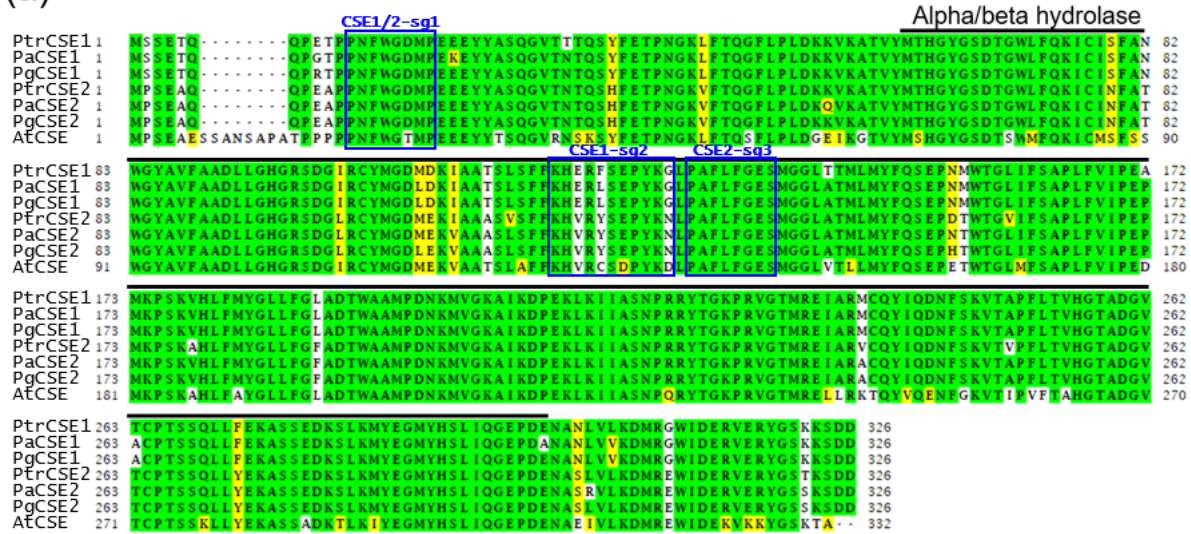

(b)

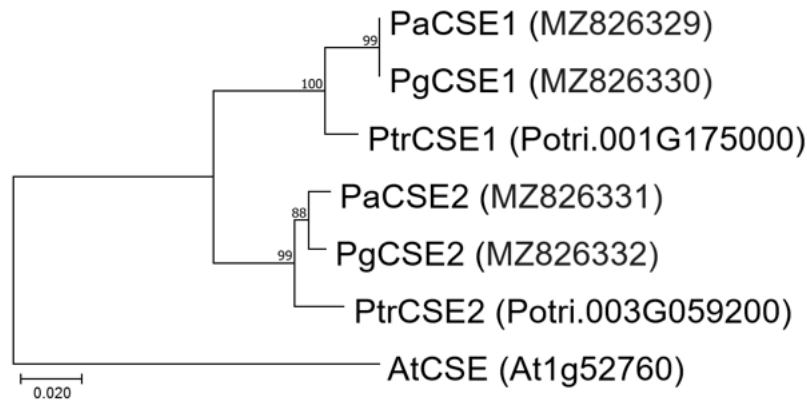

**Figure S1. Sequence analysis of poplar *CSE* genes.**

(a) Amino acid sequence alignment of *PtrCSE1* (Potri.001G175000), *PaCSE1* (MZ826329), *PgCSE1* (MZ826330), *PtrCSE2* (Potri.003G059200), *PaCSE2* (MZ826331), *PgCSE2* (MZ826332), and *Arabidopsis CSE* (At1g52760). Genbank accession numbers of *CSE* genes are shown in parenthesis.

Blue boxes indicate the single guide RNA (sg1-sg3) target sequences and alpha/beta hydrolase

domain is marked by black line. (b) Phylogenetic analysis of *CSE* proteins. Complete amino acid

sequences were aligned using ClustalW and a rooted phylogenetic tree was constructed using MEGA

7 (<https://www.megasoftware.net/>) with the Neighbor-Joining method (1,000 bootstrap replicates) and

Jones-Taylor-Thornton (JTT) model.

(a)

| Single guide<br>RNA / Target<br>gene | #RGEN Target (5' to 3')                | Position | Direction | GC Contents<br>(w/o PAM) | Out-of-frame<br>Score | Mismatches |   |   |   |
|--------------------------------------|----------------------------------------|----------|-----------|--------------------------|-----------------------|------------|---|---|---|
|                                      |                                        |          |           |                          |                       | 0          | 1 | 2 |   |
| Sg1 / <i>PaCSE1</i>                  | CAACTTCTGGGGCGACATGCCGG                | Exon 1   | 36        | +                        | 60                    | 65.3       | 2 | 0 | 0 |
|                                      | <i>PgCSE1</i> CAACTTCTGGGGCGACATGCCGG  |          | 36        | +                        | 60                    | 63         | 2 | 0 | 0 |
|                                      | <i>PaCSE2</i> CAACTTCTGGGGCGACATGCCGG  |          | 36        | +                        | 60                    | 58         | 2 | 0 | 0 |
|                                      | <i>PgCSE2</i> CAACTTCTGGGGCGACATGCCGG  |          | 36        | +                        | 60                    | 58         | 2 | 0 | 0 |
| Sg2 / <i>PaCSE1</i>                  | GCGCTTAAGCGAACCATAACAAGG               | Exon 2   | 366       | +                        | 50                    | 57.7       | 0 | 1 | 0 |
|                                      | <i>PgCSE1</i> GCGCTTCAGCGAACCATAACAAGG |          | 366       | +                        | 55                    | 54.9       | 1 | 0 | 0 |
| Sg3 / <i>PaCSE2</i>                  | AACCTGCCCGCCTTCTTATTGG                 | Exon 2   | 397       | +                        | 50                    | 64.3       | 0 | 1 | 0 |
|                                      | <i>PgCSE2</i> AACCTGCCCGCCTTCTTATTGG   |          | 397       | +                        | 50                    | 64.3       | 0 | 1 | 0 |

(b)

| Single guide RNA / Target gene          | Target sequence                         |
|-----------------------------------------|-----------------------------------------|
| Sg1 / <i>PaCSE1/2</i> & <i>PgCSE1/2</i> | 5'- <u>CCCA</u> ACTTCTGGGGCGACATGCC -3' |
| Sg2 / <i>PaCSE1</i> & <i>PgCSE1</i>     | 5'- GCGTTAAGCGAACCATAACA <u>AGG</u> -3' |
| Sg3 / <i>PaCSE2</i> & <i>PgCSE2</i>     | 5'- <u>CCCG</u> CCTTCTTATTGGCGAGTC -3'  |

**Figure S2. Design of single guide RNAs to target CSE genes in poplar.**

(a) Design of single guide RNAs for CSE using Cas-Designer of the CRISPR RGEN Tools (<http://www.rgenome.net/cas-designer>). sg1 is the 37-56th nucleotide sequence of the first exon, and targets both *PaCSE1* and *PgCSE2*. sg2 and sg3 correspond to the 366-386th and 397-417th nucleotide sequences of the 2nd exons of *PaCSE1* and *PgCSE2*, respectively. Selected target sequences had a low number of mismatches and an out-of-frame score of 55 or higher. (b) Final single guide RNA sequences used in this study. The protospacer adjacent motif (PAM) sequence is underlined.
